# 1 **Age Grading *An. Gambiae* and *An. Arabiensis* Using Near** 2 **Infrared Spectra and Artificial Neural Networks**

3 Masabho P. Milali<sup>1,2\*</sup>, Maggy T. Sikulu-Lord<sup>3</sup>, Samson S. Kiware<sup>1,2</sup>, Floyd Dowell<sup>4</sup>, George F.  
4 Corliss<sup>5</sup> and Richard J. Povinelli<sup>5</sup>

5  
6

7 <sup>1</sup> Ifakara Health Institute, Environmental Health and Ecological Sciences Thematic Group, Ifakara,  
8 Tanzania

9 <sup>2</sup> Department of Mathematics, Statistics and Computer Science, Marquette University, Wisconsin,  
10 USA

11 <sup>3</sup> Queensland Alliance of Agriculture and Food Innovation, The University of Queensland, Brisbane,  
12 Queensland, Australia

13 <sup>4</sup> USDA, Agricultural Research Service, Center for Grain and Animal Health Research, 1515  
14 College Avenue, Manhattan, KS, 66502

15 <sup>5</sup> Department of Electrical and Computer Engineering, Marquette University, Wisconsin, USA

16

17 \*Corresponding author

18 pmasabho@ihi.or.tz

19

## 20 **Abstract**

## 21 **Background**

22 Near infrared spectroscopy (NIRS) is currently complementing techniques to age-grade  
23 mosquitoes. NIRS classifies lab-reared and semi-field raised mosquitoes into  $<$  or  $\geq 7$  days old with  
24 an average accuracy of 80%, achieved by training a regression model using partial least squares  
25 (PLS) and interpreted as a binary classifier.

## 26 **Methods and findings**

27 We explore whether using an artificial neural network (ANN) analysis instead of PLS  
28 regression improves the current accuracy of NIRS models for age-grading malaria transmitting  
29 mosquitoes. We also explore if directly training a binary classifier instead of training a regression  
30 model and interpreting it as a binary classifier improves the accuracy.

31 A total of 786 and 870 NIR spectra collected from laboratory reared *An. gambiae* and *An.*  
32 *arabiensis*, respectively, were used and pre-processed according to previously published protocols.  
33 Based on ten-fold Monte Carlo cross-validation, an ANN regression model scored root mean  
34 squared error (RMSE) of  $1.6 \pm 0.2$  for *An. gambiae* and  $2.8 \pm 0.2$  for *An. arabiensis*; whereas the  
35 PLS regression model scored RMSE of  $3.7 \pm 0.2$  for *An. gambiae*, and  $4.5 \pm 0.1$  for *An.*  
36 *arabiensis*. When we interpreted regression models as binary classifiers, the accuracy of the ANN  
37 regression model was  $93.7 \pm 1.0 \%$  for *An. gambiae*, and  $90.2 \pm 1.7 \%$  for *An. arabiensis*; while  
38 PLS regression model scored the accuracy of  $83.9 \pm 2.3\%$  for *An. gambiae*, and  $80.3 \pm 2.1\%$  for  
39 *An. arabiensis*. We also find that a directly trained binary classifier yields higher age estimation  
40 accuracy than a regression model interpreted as a binary classifier. A directly trained ANN binary  
41 classifier scored an accuracy of  $99.4 \pm 1.0$  for *An. gambiae*, and  $99.0 \pm 0.6\%$  for *An. arabiensis*;  
42 while a directly trained PLS binary classifier scored  $93.6 \pm 1.2\%$  for *An. gambiae*, and  $88.7 \pm$   
43  $1.1\%$  for *An. arabiensis*.

## 44 **Conclusion**

45 Training both regression and binary classification age models using ANNs yields models with  
46 higher estimation accuracies than when the same age models are trained using PLS. Regardless of  
47 the model architecture, directly trained binary classifiers score higher accuracy on classifying age of  
48 mosquitoes than a regression model translated as binary classifier. Therefore, we recommend  
49 training models to estimate age of *An. gambiae* and *An. arabiensis* using ANN model architectures  
50 and direct training of binary classifier instead of training a regression model and interpret it as a  
51 binary classifier.

## 52 Introduction

53 Estimating the age of mosquitoes is one of the indicators used by entomologists for estimating  
54 vectorial capacity [1] and the effectiveness of an existing mosquito control intervention. Malaria is a  
55 vector-borne parasitic disease transmitted to people by mosquitoes of the genus *Anopheles*. The  
56 disease killed approximately 445,000 people in 2016 [2]. Mosquitoes contribute to malaria  
57 transmission by hosting and allowing the development to maturity of the malaria-causing  
58 *Plasmodium* parasite [3]. Depending on environmental temperature, *Plasmodium* takes 10-14 days  
59 in an *Anopheles* mosquito to develop fully enough to be transmitted to humans [3]. Therefore,  
60 knowing the age of a mosquito provides an indication of whether a mosquito is capable of  
61 transmitting malaria.

62 Knowing the age of a mosquito population is also important when evaluating the effectiveness  
63 of a mosquito control intervention. Commonly used vector control interventions such as insecticide  
64 treated nets (ITNs) and indoor residual spraying (IRS) reduce the abundance and the lifespan of a  
65 mosquito population to a level that does not support *Plasmodium* parasite development to maturity  
66 [4, 5]. Monitoring and evaluation of ITNs and IRS involves determining the age and species  
67 composition of the mosquito population before and after intervention. The presence of a small  
68 number of old mosquitoes in an area with an (ITNs or IRS) intervention indicates that the  
69 intervention is working. On the other hand, if there are more old mosquitoes, the intervention is not  
70 working effectively.

71 The current techniques used to estimate mosquito age are based on a combination of ovary  
72 dissecting and conventional microscopy to determine their egg laying history. Those found to have  
73 laid eggs are assumed to be older than those found to not have laid eggs [6]. This assumption can be  
74 misleading, as mosquitoes can be old but have not laid eggs and can be young (at least three days  
75 old), and have laid eggs. Dissection is laborious, difficult, and limited to only few experts. As a  
76 result, we need a new approach to address these limitations.

77 Different techniques such as a change in abundance of cuticular hydrocarbons [7, 8],  
78 transcriptional profiles [9, 10], and proteomics [11, 12] have been developed to age grade *Anopheles*  
79 mosquitoes. However, these techniques are still in early development stages and are limited to  
80 analyzing a small number of samples due to high analysis costs involved.

81 Near infrared spectroscopy (NIRS) is a complementary method to the current mosquito age  
82 grading techniques [13, 14]. NIRS is a high throughput technique, which measures the amount of the  
83 near infrared energy absorbed by samples. NIRS has been applied to identify species of insects  
84 infecting stored grains [15]; to age grade houseflies [16], stored-grain pests [17], and biting midges  
85 [18]; to differentiate between species and subspecies of termites [19]; to estimate the age and to

86 identify species of morphologically indistinguishable laboratory reared and semi-field raised  
87 *Anopheles gambiae* and *Anopheles arabiensis* mosquitoes [13, 14, 20-23]; to estimate the age of  
88 *Aedes aegypti* mosquitoes [24]; and to detect and identify two strains of *Wolbachia pipientis*  
89 (wMelPop and wMel) in male and female laboratory-reared *Aedes aegypti* mosquitoes [25].

90 The current state-of-the-art of the accuracy of NIRS to classify the age of lab-reared *An.*  
91 *gambiae* and *An. arabiensis* is an average of 80% [13, 14, 20-23]. This accuracy is based on a  
92 trained regression model using partial least squares (PLS) and interpreted as a binary classifier to  
93 classify mosquitoes into two age groups ( $< 7$  days and  $\geq 7$  days).

94 In this paper, using a set of spectra collected from lab-reared *An. gambiae* and *An. arabiensis*,  
95 we explored ways to improve the reported accuracy of a PLS model for estimating age of malaria-  
96 transmitting mosquitoes. Selection of a method to train a model is one of the important factors  
97 influencing the accuracy of the model [26]. Studies [27-30] compared the accuracies of artificial  
98 neural network (ANN) and PLS regression models for predicting respiratory ventilation; explored  
99 the application of ANN and PLS to predict the changes of anthocyanins, ascorbic acid, total phenols,  
100 flavonoids, and antioxidant activity during storage of red bayberry juice; determined glucose  
101 multivariation in whole blood using partial least-squares and artificial neural networks based on  
102 mid-infrared spectroscopy; and compared modeling of nonlinear systems with artificial neural  
103 networks and partial least squares, concluding that ANN models generally perform better than PLS  
104 models. Therefore, using ANN [29-31] and PLS, we trained regression age models and compared  
105 results.

106 Since previous studies [13, 14, 20-23] trained a regression model and interpreted it as a binary  
107 classifier ( $< 7$  d and  $\geq 7$  d), the interpretation process may introduce errors and compromise the  
108 accuracy of the model. We further trained ANN and PLS binary classifiers and compared their  
109 accuracies with the ANN and PLS regression models translated as binary classifiers.

110 We find that training of both regression and binary classification models using an artificial  
111 neural network architectures yields higher accuracies than when the corresponding models are  
112 trained using partial least squares model architectures. Also, regardless of the architecture of the  
113 model, training a binary classifier yields higher age class estimation accuracy than a regression  
114 model interpreted as a binary classifier.

115

## 116 **Materials and methods**

### 117 **Ethics approval**

118           Permission for blood feeding laboratory-reared mosquitoes was obtained from the Ifakara  
119 Health Institute (IHI) Review Board, under Ethical clearance No. IHRDC/EC4/CL.N96/2004. Oral  
120 consent was obtained from each adult volunteer involved in the study. The volunteers were given the  
121 right to refuse to participate or to withdraw from the experiment at any time.

### 122 **Mosquito and spectra collection**

123           We used spectra of *Anopheles gambiae* mosquito collected at 1, 3, 5, 7, 9, 11, 15, and 20  
124 days and *An. arabiensis* collected at 1, 3, 5, 7, 9, 11, 15, 20 and 25 days post emergence from the  
125 Ifakara Health Institute insectary. While *An. arabiensis* were reared in a semi-field system (SFS) at  
126 ambient conditions, *An. gambiae* were reared in a room made of bricks at controlled conditions.  
127 Adult mosquitoes were often provided with a human blood meal in a week and 10% glucose  
128 solution daily. Using a LabSpec 5000 NIR spectrometer with an integrated light source (ASD Inc.,  
129 Longmont, CO), we followed the protocol supplied by Mayagaya and colleagues to collect spectra  
130 [13]. Prior to spectra collection, as opposed to killing by chloroform, mosquitoes were killed by  
131 freezing for 20 minutes. A total of 786 *An. gambiae* and 870 *An. arabiensis* were scanned with at  
132 least 70 mosquitoes from each age group.

### 133 **Model training**

134           We first trained ANN and PLS regression models, scored and compared their accuracies as  
135 regressors and then as binary classifiers. We further trained binary classifiers and compared the  
136 accuracies with regressors interpreted as binary classifiers. We used a two-tail t-test to test the  
137 hypothesis that there is significant difference in accuracies between ANN and PLS trained model, a  
138 one-tail t-test to test the hypothesis that an ANN trained model scores higher accuracies than a PLS  
139 trained model.

140           In each species, we separately processed spectra according to Mayagaya et. al, randomized,  
141 and divided processed spectra into two groups. The first group contained 70% of the total spectra  
142 and was used for training models. The second group had 30% of the total spectra and was used for  
143 out-of-sample testing.

144           We trained a PLS ten-components model on using ten-fold cross validation [32]. Even though  
145 a range of six to ten PLS components were used in previous studies [13, 14, 20-22], we used ten  
146 PLS components after plotting the percentage of variance explained in the dependent variable  
147 against the number of PLS components (S1 Fig in the supporting information). For both species,

148 there is not much change in the percentage variance explained in the dependent variables beyond ten  
149 components.

150 For the ANN model, we trained a feed-forward ANN with one hidden layer, ten neurons,  
151 and a linear transfer function (purelin) using Levenberg-Marquardt (damped least-squares)  
152 optimization [33]. We used actual mosquito ages as labels during training of both PLS and ANN  
153 regression models. We determined whether the trained models are over-fit by applying trained  
154 models (PLS and ANN) to estimate ages of mosquitoes on both training (in sample) and test (out-of-  
155 sample) data sets. Normally, if the model is not over-fit, the accuracy of the model is consistent  
156 between training and test sets [34].

157 The accuracies of the models were determined by computing their root mean squared error  
158 (RMSE) [35-37]. We evaluated the influence of the model architecture on the model accuracy by  
159 comparing their accuracies.

160 When interpreting the regression models as binary classifiers, mosquitoes with an estimated  
161 age  $< 7$  days were considered as less than seven days old, and those  $\geq 7$  were considered older than  
162 or equal to seven days old. Using Equations 1, 2, and 3, we computed and compared sensitivity,  
163 specificity, and accuracy between the PLS and ANN regression models interpreted as binary  
164 classifiers. Sensitivity of the model is the ability to classify mosquitoes correctly, which are older  
165 than or equal to seven days old (assumed to be positively related to malaria transmission), and  
166 specificity is the ability of the model to classify mosquitoes correctly which are less than seven days  
167 old (assumed to be negatively related to malaria transmission) [38-40].

168

169 Sensitivity = 
$$\frac{\text{Number of mosquitoes correctly predicted as } \geq 7 \text{ days old}}{\text{Total number of mosquitoes } \geq 7 \text{ days old}} \quad (1)$$

170

171 Specificity = 
$$\frac{\text{Number of mosquitoes correctly predicted } < 7 \text{ days old}}{\text{Total number mosquitoes } < 7 \text{ days old}} \quad (2)$$

172

173 Accuracy = 
$$\frac{\text{Sensitivity} + \text{Specificity}}{\text{Total number of all mosquitoes in a test set}} \quad (3)$$

174

175 Training a regression model and interpreting it as a binary classifier can compromise the  
176 accuracy of the model as a classifier. This is because, while training a regression model forces the  
177 model to learn differences between actual ages of mosquitoes, direct training of a binary classifier  
178 forces the model to learn similarities between mosquitoes of the same class and only differences  
179 between two classes. Therefore, we directly trained binary classification models using ANN and

180 PLS architectures and compare the accuracies with the ANN and PLS regression models interpreted  
181 as binary classifiers. In both species, we divided processed spectra (786 spectra for *An. gambiae* and  
182 870 spectra for *An. arabiensis*) into two groups;  $< 7$  days old and  $\geq 7$  days old. The spectra in a  
183 group with mosquitoes  $< 7$  days old were labeled 0, 1 for those in a group with mosquitoes  $\geq 7$  days  
184 old, and the two groups were merged. The spectra were randomized and divided into training ( $N =$   
185 508 for both species) and test ( $N = 278$  for *An. gambiae* and  $N = 362$  for *An. arabiensis*) sets. We  
186 trained a PLS ten-component model using ten-fold cross-validation [32] and a one hidden layer, ten  
187 neuron feed-forward ANN using logistic regression as a transfer function and Levenberg-Marquardt  
188 (damped least-squares) optimization for training [33, 41]. During interpretation of these models,  
189 mosquitoes  $< 0.5$  were considered as  $< 7$  days old and  $\geq 0.5$  as  $\geq 7$  days old. Using Equations 1, 2,  
190 and 3, for each species, we computed specificity, sensitivity, and accuracy of the trained PLS and  
191 ANN binary classifiers and compared to the PLS and ANN regressors interpreted as the binary  
192 classifiers.

193 We repeated the process of random splitting the dataset into training and test sets; training,  
194 testing and scoring the accuracies of trained models ten times and compare the average results, a  
195 process known as Monte Carlo cross-validation [42-44].

## 196 **Results**

197 Both PLS and ANN regression models consistently estimated the age of *An. gambiae* and *An.*  
198 *arabiensis* in the training and test data sets, showing that the models were not over-fit during  
199 training (Fig 1). Table 1, S2 Fig in the supporting information and Fig 2 present the performances of  
200 PLS and ANN regression models when estimating actual age of *An. gambiae* and *An. arabiensis* in  
201 the test data set and when their outputs are interpreted into two age classes, showing significant  
202 differences in accuracies of the two models (PLS vs ANN models). Table 1 further shows that the  
203 ANN regression model scores significantly higher accuracy than the PLS regression model.

204

205

206 **Fig 1: PLS (A and C) and ANN (B and D) regression models, estimating actual age of training**  
207 **and testing samples of *An. gambiae* (A and B) and *An. arabiensis* (C and D), respectively.**



208 **Table 1: Performance analysis of PLS and ANN regression models on estimating age of *An.***  
 209 ***gambiae* and *An. arabiensis*. Results from ten-fold Monte Carlo cross-validation.**

| Species               | Model estimation | Metric          | Model architecture |            | P-value (two tail)      | P-value (one tail)      |
|-----------------------|------------------|-----------------|--------------------|------------|-------------------------|-------------------------|
|                       |                  |                 | PLS                | ANN        |                         |                         |
| <i>An. gambiae</i>    | Actual age       | RMSE            | 3.7 ± 0.2          | 1.6 ± 0.2  | 3.9 x 10 <sup>-09</sup> | 1.6 x 10 <sup>-11</sup> |
|                       | Age class        | Accuracy (%)    | 83.9 ± 2.3         | 93.7 ± 1.0 | 3.6 x 10 <sup>-07</sup> | 2.3 x 10 <sup>-07</sup> |
|                       |                  | Sensitivity (%) | 89.0 ± 2.1         | 92.5 ± 1.6 | 4.7 x 10 <sup>-02</sup> | 4.7 x 10 <sup>-01</sup> |
|                       |                  | Specificity (%) | 75.8 ± 5.2         | 95.6 ± 1.8 | 3.7 x 10 <sup>-11</sup> | 1.1 x 10 <sup>-06</sup> |
| <i>An. arabiensis</i> | Actual age       | RMSE            | 4.5 ± 0.1          | 2.8 ± 0.2  | 1.7 x 10 <sup>-09</sup> | 5.9 x 10 <sup>-08</sup> |
|                       | Age class        | Accuracy (%)    | 80.3 ± 2.1         | 90.2 ± 1.7 | 1.4 x 10 <sup>-07</sup> | 2.4 x 10 <sup>-08</sup> |
|                       |                  | Sensitivity (%) | 90.5 ± 1.9         | 91.7 ± 3.3 | 5.8 x 10 <sup>-01</sup> | 6.0 x 10 <sup>-01</sup> |
|                       |                  | Specificity (%) | 60.3 ± 4.2         | 88.4 ± 3.9 | 1.7 x 10 <sup>-07</sup> | 1.2 x 10 <sup>-06</sup> |

210

211

212

213 **Fig 2: Number of *An. gambiae* s.s (A and B) and *An. arabiensis* (C and D) in two age classes**  
 214 **(less than or greater/equal seven days) when PLS (A and C) and ANN (B and D) regression**  
 215 **models, respectively, interpreted as binary classifiers.**

216

217

218 Fig 3 represents consistency in accuracy of PLS (A and C) and ANN (B and D) directly trained  
 219 binary classifiers on estimating both training and test data sets, showing that the models were not  
 220 over-fitted during training. Fig 4, S3 Fig in the supporting information and Table 2 present the  
 221 results when directly trained PLS (A and C) and ANN (B and D) binary classifiers were applied to  
 222 classify ages of *An. gambiae* (A and B) and *An. arabiensis* (C and D) in test sets (out-of-the sample  
 223 testing), showing ANN binary classifier scores higher accuracy than the PLS binary classifier. The  
 224 results further show that in both species, irrespective of the architecture used to train the model,



225 direct training of the binary classifier scores significantly higher accuracy, specificity, and  
 226 sensitivity than the regression model translated as a binary classifier (S1 Table in the supporting  
 227 information).

228

229

230 **Fig 3: The consistency in accuracies of directly trained PLS (A and C) and ANN (B and D)**  
 231 **binary classifiers for estimating age classes of *An.gambiae* (A and B) and *An. arabiensis* (C and**  
 232 **D) in both training and testing sets.**

233

234

235 **Fig 4: The number of correct and false predictions in each estimated age-class when directly**  
 236 **trained PLS (A and C) and ANN (B and D) binary classifiers were applied to classify age of**  
 237 ***An. gambiae* (A and B) and *An. arabiensis* (C and D) in testing sets. Results from ten replicates.**

238

239

**Table 2: Comparison of the accuracy of ANN and PLS classification models on ten replicates**

| Species               | Metric          | Model architecture |            | P-value<br>(two-tail)   | P-value<br>(one-tail)   |
|-----------------------|-----------------|--------------------|------------|-------------------------|-------------------------|
|                       |                 | PLS                | ANN        |                         |                         |
| <i>An. gambiae</i>    | Accuracy (%)    | 93.6 ± 1.2         | 99.4 ± 1.0 | 2.4 x 10 <sup>-19</sup> | 1.2 x 10 <sup>-19</sup> |
|                       | Sensitivity (%) | 94.4 ± 1.6         | 99.3 ± 1.4 | 1.6 x 10 <sup>-04</sup> | 2.0 x 10 <sup>-05</sup> |
|                       | Specificity (%) | 92.4 ± 1.9         | 99.5 ± 0.7 | 2.2 x 10 <sup>-06</sup> | 6.0 x 10 <sup>-05</sup> |
| <i>An. arabiensis</i> | Accuracy (%)    | 88.7 ± 1.1         | 99.0 ± 0.6 | 1.5 x 10 <sup>-21</sup> | 7.6 x 10 <sup>-22</sup> |
|                       | Sensitivity (%) | 95.4 ± 1.4         | 99.5 ± 0.5 | 4.5 x 10 <sup>-05</sup> | 2.3 x 10 <sup>-05</sup> |
|                       | Specificity (%) | 75.2 ± 3.4         | 98.3 ± 1.3 | 4.0 x 10 <sup>-09</sup> | 2.0 x 10 <sup>-09</sup> |

240

241

## 242 Discussion

243 This study aimed at improving the current state of the art accuracies of the models trained using near  
 244 infrared spectra to estimate the age of *An. gambiae* and *An. arabiensis*. Previous studies [13, 14, 20-  
 245 23] trained a regression model using partial least squares (PLS) and interpreted it as a binary  
 246 classifier (< 7 d and ≥ 7 d) with an accuracy around 80%.

247           Knowing that the selection of a model architecture often influences the model accuracy [26],  
248 we trained age regression models using an artificial neural network [29-31, 45, 46] and partial least  
249 squares as model architectures and compared the accuracies. ANN models achieved significantly  
250 higher accuracies than corresponding PLS regression models. As summarized in Table 1, ANN  
251 regression models scored an average RMSE of  $1.60 \pm 0.18$  for *An. gambiae* and  $2.81 \pm 0.22$  for  
252 *An. arabiensis*. The PLS regression models scored RMSE of  $3.66 \pm 0.23$  for *An. gambiae* and  $4.49$   
253  $\pm 0.09$  for *An. arabiensis*. When both ANN and PLS regression models were interpreted as binary  
254 classifiers, ANN regression model scored accuracy, sensitivity, and specificity of  $93.71 \pm 1.03\%$ ,  
255  $92.54 \pm 1.60\%$ , and  $95.64 \pm 1.82\%$ , respectively, for *An. gambiae*;  $90.16 \pm 1.70\%$ ,  $91.68 \pm$   
256  $3.27\%$  and  $88.44 \pm 3.86\%$ , respectively, for *An. arabiensis*. The PLS regression model scored  
257 accuracy, sensitivity, and specificity of  $83.85 \pm 2.32\%$ ,  $89.00 \pm 2.10\%$ , and  $75.82 \pm 5.22\%$ ,  
258 respectively, for *An. gambiae*;  $80.30 \pm 2.06\%$ ,  $90.48 \pm 1.88\%$ , and  $60.25 \pm 4.20\%$ , respectively,  
259 for *An. arabiensis*.

260           The interpretation of a regression model into a binary classifier can introduce errors that  
261 compromise the accuracy of the model. We directly trained PLS and ANN binary classifiers and  
262 compared the accuracies with ANN and PLS regression models interpreted as binary classifiers.  
263 Irrespective of the model architecture, directly trained binary classifiers scored significantly higher  
264 accuracies than corresponding regression models interpreted as binary classifiers (S1 Table in the  
265 supporting information). The explanation of these results could be that, training a regression model  
266 and interpreting it as a binary classifier involved learning differences between multiple age groups  
267 (1, 3, 5, 7, 9, 11, 13, 15, and 20 days old for *An. gambiae* and 1, 3, 5, 7, 9, 11, 13, 15, 20 and 25 days  
268 for *An. arabiensis*) of mosquitoes, which can be challenging for two consecutive age groups. In  
269 contrast, direct training of the binary classifier involved learning differences existing between only  
270 two age groups. During direct training of the binary classifier, the process of dividing spectra into  
271 two groups ( $< 7$  or  $\geq 7$  days) forced a model to learn similarities instead of differences between  
272 mosquitoes of the same age class. We also observed that directly trained ANN binary classifier  
273 scored higher accuracy than directly trained PLS binary classifier. ANN binary classifier scored an  
274 accuracy, sensitivity, and specificity of  $99.4 \pm 1.0\%$ ,  $99.3 \pm 1.4\%$ , and  $99.5 \pm 0.7\%$ ,  
275 respectively, for *An. gambiae*;  $99.0 \pm 0.6\%$ ,  $99.5 \pm 0.5\%$ , and  $98.3 \pm 1.3\%$ , respectively, for *An.*  
276 *arabiensis*. The PLS binary classifier scored  $93.6 \pm 1.2\%$ ,  $94.4 \pm 1.6\%$ , and  $92.5 \pm 1.9\%$  for *An.*  
277 *gambiae*;  $88.7 \pm 1.1\%$ ,  $95.5 \pm 1.4\%$ , and  $75.2 \pm 3.5\%$  for *An. arabiensis* (Table 2).

278           Our study is not the first to observe ANN model outperforming PLS model. These findings  
279 are supported with other previous studies [27-29, 31] compared the accuracies of ANN and PLS  
280 models, where they report ANN perform better than PLS. The explanation on these results could be

281 that ANN, unlike PLS, considers both linear and unknown non-linear relationships between  
282 dependent and independent variables [29-31]; builds independent-dependent relationships that  
283 interpolates well even to cases that were not exactly presented by training data; and has a self  
284 mechanism of filtering and handling noisy data during training [45, 46]. Hence, ANN models are  
285 unbiased estimators in contrast to PLS models (Fig 5 and S4 Fig in supporting information).

286

287

288 **Fig 5. Error distribution per actual age of *An. gambiae* and *An. arabiensis* when ANN and PLS**  
289 **regressors applied to estimate the actual ages of mosquitoes in training and test data sets,**  
290 **showing uniform distribution of errors (un-biased estimating) across actual ages of mosquitoes**  
291 **for ANN regressor and un-uniform distribution of errors (biased estimating) for PLS**  
292 **regressor.**

293

294

## 295 **Conclusion**

296 We conclude that training both regression and binary classification age artificial neural network  
297 models yield higher accuracies than partial least squares models. Also, training a binary classifier  
298 scores higher accuracy than training a regression model and interpreting it as a binary classifier.  
299 Hence, we recommend training of age models using artificial neural network and training of binary  
300 classifier instead of training regression model and interpret it as binary classifier.

## 301 **Acknowledgements**

302 We thank Andrew Kafwenji and Paulina Kasanga for help maintaining the mosquito colony, Marta  
303 F. Maia, Fredros O. Okumu, and Sheila Ogoma for participating in grant writing and managing of  
304 the project produced the data used in this manuscript, and the USDA, Agricultural Research Service,  
305 Center for Grain and Animal Health Research, USA for loaning us the near-infrared spectrometer  
306 used to scan the mosquitoes. We also thank Michael Henry and Nikita Lysenko for helping with  
307 mosquito scanning to collect spectra in Tanzania. Finally, Gustav Mkandawile who worked  
308 tirelessly to make sure we obtained mosquitoes and Ben Durette who participated in the initial stages  
309 of data analysis.

310

311 Mention of trade names or commercial products in this publication is solely for the purpose  
312 of providing specific information and does not imply recommendation or endorsement by the U.S.  
313 Department of Agriculture. USDA is an equal opportunity provider and employer.



## 315 **References**

- 316 1. Dye C. The Analysis of Parasite Transmission by Bloodsucking Insects. *Annu Rev Entomol.*  
317 1992;37(1):1-19.
- 318 2. WHO. World Malaria Report. Geneva, World Health Organization. 2017.
- 319 3. Beier JC. Malaria Parasite Development in Mosquitoes. *Annu Rev Entomol.* 1998;43(1):519-43.
- 320 4. Robert V, Carnevale P. Influence of Deltamethrin Treatment of Bed Nets on Malaria  
321 Transmission in the Kou Valley, Burkina Faso. *Bull World Health Organ.* 1991;69(6):735.
- 322 5. Magesa SM, Wilkes TJ, Mnzava A, Njunwa KJ, Myamba J, Kivuyo MDP, Hills N, Lines JD,  
323 Curtis CF. Trial of Pyrethroid Impregnated Bednets in an Area of Tanzania Holoendemic for  
324 Malaria Part 2. Effects on the Malaria Vector Population. *Acta Trop.* 1991;49(2):97-108.
- 325 6. Detinova TS. Age Grouping Methods in Diptera of Medical Importance with Special Reference to  
326 Some Vectors of Malaria. *Monogr Ser World Health Organization.* 1962; 47:13-108.
- 327 7. Hugo LE, Kay BH, Eaglesham GK, Holling N, Ryan PA. Investigation of Cuticular  
328 Hydrocarbons for Determining the Age and Survivorship of Australasian Mosquitoes. *American*  
329 *Journal of Tropical Medicine and Hygiene.* 2006;74(3):462-74.
- 330 8. Caputo B, Dani FR, Horne GL, Petrarca V, Turillazzi S, Coluzzi M, Priestman AA, Tores AD.  
331 Identification and Composition of Cuticular Hydrocarbons of the Major Afrotropical Malaria Vector  
332 *Anopheles gambiae* ss (Diptera: *Culicidae*): Analysis of Sexual Dimorphism and Age-related  
333 Changes. *Journal of Mass Spectrometry.* 2005;40(12):1595-604.
- 334 9. Wang M, Marinotti O, James AA, Walker E, Githure J, Yan G. Genome-wide Patterns of Gene  
335 Expression During Aging in the African Malaria Vector *Anopheles gambiae*. *PLoS One.*  
336 2010;5(10):e13359.
- 337 10. Cook PE, Sinkins SP. Transcriptional Profiling of *Anopheles gambiae* Mosquitoes for Adult Age  
338 Estimation. *Insect Mol Biol.* 2010;19(6):745-51.
- 339 11. Sikulu MT, Monkman J, Dave KA, Hastie ML, Dale PE, Kitching RL, Killeen GF, Kay BH,  
340 Gorman JJ, Hugo LE. Proteomic Changes Occurring in the Malaria Mosquitoes *Anopheles gambiae*  
341 and *Anopheles stephensi* During Aging. *Journal of Proteomics.* 2015;126:234-44.

- 342 12. Sikulu MT, Monkman J, Dave KA, Hastie ML, Dale PE, Kitching RL, Killeen GF, Kay BH,  
343 Gorman JJ, Hugo LE. Mass Spectrometry Identification of Age-associated Proteins from the Malaria  
344 Mosquitoes *Anopheles gambiae ss* and *Anopheles stephensi*. Data in brief. 2015;4:461-7.
- 345 13. Mayagaya VS, Michel K, Benedict MQ, Killeen GF, Wirtz RA, Ferguson HM, Dowell FE. Non-  
346 destructive Determination of Age and Species of *Anopheles gambiae sl* Using Near-infrared  
347 Spectroscopy. American Journal of Tropical Medicine and Hygiene. 2009;81(4):622-30.
- 348 14. Sikulu M, Killeen GF, Hugo LE, Ryan PA, Dowell KM, Wirtz RA, Moore SJ, Dowell FE. Near-  
349 infrared Spectroscopy as a Complementary Age Grading and Species Identification Tool for African  
350 Malaria Vectors. Parasites & Vectors. 2010;3(1):1.
- 351 15. Dowell FE, Throne JE, Wang D, Baker JE. Identifying Stored-grain Insects Using Near-infrared  
352 Spectroscopy. Journal of Economic Entomology. 1999;92(1):165-9.
- 353 16. Perez-Mendoza J, Dowell FE, Broce AB, Throne JE, Wirtz RA, Xie F, Fabrick JA, Baker JE.  
354 Chronological Age-grading of House Flies by Using Near-infrared Spectroscopy. Journal of Medical  
355 Entomology. 2002;39(3):499-508.
- 356 17. Perez-Mendoza J, Throne JE, Dowell FE, Baker JE. Chronological Age-grading of Three  
357 Species of Stored-product Beetles by Using Near-infrared Spectroscopy. Journal of Economic  
358 Entomology. 2004;97(3):1159-67.
- 359 18. Reeves WK, Peiris K, Scholte E, Wirtz RA, Dowell FE. Age-grading the Biting Midge  
360 *Culicoides sonorensis* Using Near-infrared Spectroscopy. Med Vet Entomol. 2010;24(1):32-7.
- 361 19. Aldrich BT, Maghirang EB, Dowell FE, Kambhampati S. Identification of Termite Species and  
362 Subspecies of the Genus *Zootermopsis* Using Near-infrared Reflectance Spectroscopy. J Insect Sci.  
363 2007;7(1):18.
- 364 20. Sikulu MT, Majambere S, Khatib BO, Ali AS, Hugo LE, Dowell FE. Using a Near-infrared  
365 Spectrometer to Estimate the Age of *Anopheles* Mosquitoes Exposed to Pyrethroids. PloS one.  
366 2014;9(3):e90657.
- 367 21. Sikulu M, Dowell KM, Hugo LE, Wirtz RA, Michel K, Peiris KH, Moore S, Killeen GF, Dowell  
368 FE. Evaluating RNA Later® as a Preservative for Using Near-infrared Spectroscopy to Predict  
369 *Anopheles gambiae* Age and Species. Malaria Journal. 2011;10(1):186.

- 370 22. Dowell FE, Noutcha AE, Michel K. The Effect of Preservation Methods on Predicting Mosquito  
371 Age by Near-infrared Spectroscopy. *American Journal of Tropical Medicine and Hygiene*.  
372 2011;85(6):1093-6.
- 373 23. Mayagaya VS, Ntamatungiro AJ, Moore SJ, Wirtz RA, Dowell FE, Maia MF. Evaluating  
374 Preservation Methods for Identifying *Anopheles gambiae ss* and *Anopheles arabiensis* Complex  
375 Mosquitoes Species Using Near-infrared Spectroscopy. *Parasites & Vectors*. 2015;8(1):60.
- 376 24. Sikulu-Lord MT, Milali MP, Henry M, Wirtz RA, Hugo LE, Dowell FE, Devine GJ. Near-  
377 infrared Spectroscopy, a Rapid Method for Predicting the Age of Male and Female Wild-Type and  
378 *Wolbachia* Infected *Aedes aegypti*. *PLoS Negl Trop Dis*. 2016;10(10):e0005040.
- 379 25. Sikulu-Lord MT, Maia MF, Milali MP, Henry M, Mkandawile G, Kho EA, Wirtz RA, Hugo LE,  
380 Dowell FE, Devine GJ. Rapid and Non-destructive Detection and Identification of two Strains of  
381 *Wolbachia* in *Aedes aegypti* by Near-infrared Spectroscopy. *PLoS Negl Trop Dis*.  
382 2016;10(6):e0004759.
- 383 26. Mouazen AM, Kuang B, De Baerdemaeker J, Ramon H. Comparison Among Principal  
384 Component, Partial Least Squares and Back Propagation Neural Network Analyses for Accuracy of  
385 Measurement of Selected Soil Properties with Visible and Near-infrared Spectroscopy. *Geoderma*.  
386 2010;158(1):23-31.
- 387 27. Lin M, Groves W, Freivalds A, Lee E, Harper M. Comparison of Artificial Neural Network  
388 (ANN) and Partial Least Squares (PLS) Regression Models for Predicting Respiratory Ventilation:  
389 An Exploratory Study. *Eur J Appl Physiol*. 2012 May;112(5):1603-11.
- 390 28. Zheng H, Jiang L, Lou H, Hu Y, Kong X, Lu H. Application of Artificial Neural Network  
391 (ANN) and Partial Least-squares Regression (PLSR) to Predict the Changes of Anthocyanins,  
392 Ascorbic Acid, Total Phenols, Flavonoids, and Antioxidant Activity During Storage of Red  
393 Bayberry Juice Based on Fractal Analysis and Red, Green, and Blue (RGB) Intensity Values.  
394 *Journal of Agricultural and Food Chemistry*. 2011 Jan 26;;59(2):592.
- 395 29. Bhandare P, Mendelson Y, Peura RA, Janatsch G, Kruse-Jarres JD, Marbach R, Heise HM.  
396 Multivariate Determination of Glucose in Whole Blood Using Partial Least-squares and Artificial  
397 Neural Networks Based on Mid-infrared Spectroscopy. *Appl Spectrosc*. 1993;47(8):1214-21.
- 398 30. Khotanzad A, Elragal H, Lu T. Combination of Artificial Neural-network Forecasters for  
399 Prediction of Natural Gas Consumption. *IEEE Trans Neural Networks*. 2000;11(2):464-73.



- 400 31. Hadjiiski L, Geladi P, Hopke P. A Comparison of Modeling Nonlinear Systems with Artificial  
401 Neural Networks and Partial Least Squares. *Chemometrics Intellig Lab Syst.* 1999;49(1):91-103.
- 402 32. Ståhle L, Wold S. Partial Least Squares Analysis with Cross-validation for the Two-class  
403 Problem: A Monte Carlo study. *Journal of Chemometrics.* 1987;1(3):185-96.
- 404 33. Ballabio D, Consonni V, Todeschini R. The Kohonen and CP-ANN Toolbox: A Collection of  
405 MATLAB Modules for Self Organizing Maps and Counterpropagation Artificial Neural Networks.  
406 *Chemometrics Intellig Lab Syst.* 2009;98(2):115-22.
- 407 34. Cawley GC, Talbot NL. On Over-fitting in Model Selection and Subsequent Selection Bias in  
408 Performance Evaluation. *Journal of Machine Learning Research.* 2010;11(Jul):2079-107.
- 409 35. Chai T, Draxler RR. Root Mean Square Error (RMSE) or Mean Absolute Error (MAE)?–  
410 Arguments Against Avoiding RMSE in the Literature. *Geoscientific Model Development.*  
411 2014;7(3):1247-50.
- 412 36. Willmott CJ, Matsuura K. Advantages of the Mean Absolute Error (MAE) Over the Root Mean  
413 Square Error (RMSE) in Assessing Average Model Performance. *Climate Research.* 2005;30(1):79-  
414 82.
- 415 37. Hyndman RJ, Koehler AB. Another Look at Measures of Forecast Accuracy. *International*  
416 *Journal of Forecast.* 2006;22(4):679-88.
- 417 38. Altman DG, Bland JM. Statistics Notes: Diagnostic Tests 1: Sensitivity and Specificity. *BMJ.*  
418 1994 Jun 11,;308(6943):1552.
- 419 39. Smith C. Diagnostic Tests (1) – Sensitivity and Specificity. *Phlebology.* 2012 Aug;27(5):250-1.
- 420 40. Lalkhen AG, McCluskey A. Clinical Tests: Sensitivity and Specificity. *Continuing Education in*  
421 *Anaesthesia, Critical Care & Pain.* 2008 Dec;8(6):221-3.
- 422 41. Moré JJ. The Levenberg-Marquardt Algorithm: Implementation and Theory. In *Numerical*  
423 *Analysis.* Springer, Berlin, Heidelberg. 1978 (pp. 105-116).
- 424 42. Xu Q, Liang Y. Monte Carlo Cross Validation. *Chemometrics Intellig Lab Syst.* 2001;56(1):1-  
425 11.

- 426 43. Xu Q, Liang Y, Du Y. Monte Carlo Cross-validation for Selecting a Model and Estimating the  
427 Prediction Error in Multivariate Calibration. *A Journal of the Chemometrics Society*.  
428 2004;18(2):112-20.
- 429 44. Dubitzky W, Granzow M, Berrar DP. *Fundamentals of Data Mining in Genomics and*  
430 *Proteomics*. Springer Science & Business Media; 2007.
- 431 45. Rosenblatt F. *Principles of neurodynamics. Perceptrons and the Theory of Brain Mechanisms*.  
432 1961.
- 433 46. McCulloch WS, Pitts W. A Logical Calculus of the Ideas Immanent in Nervous Activity. *Bull*  
434 *Math Biophys*. 1943;5(4):115-33.
- 435

## 436 **Supporting information**

437 **S1 Fig. The percentage of variance explained in the dependent variable against the number of**  
438 **PLS components: A) *An. gambiae* B) *An. arabiensis* (TIFF)**

439

440 **S2 Fig. Box plot showing the performance of ANN and PLS regression models when applied to**  
441 **estimate the actual ages of *An. gambiae* and *An. arabiensis* in the test data set. (TIFF)**

442

443 **S3 Fig. Box plot showing the performance of a directly trained ANN and PLS binary**  
444 **classifiers when applied to estimate the age classes of *An. gambiae* and *An. arabiensis* in the test**  
445 **data set. (TIFF)**

446

447 **S4 Fig. Error distribution per actual age class of *An. gambiae* and *An. arabiensis* when directly**  
448 **trained ANN and PLS binary classifiers applied to estimate age classes of mosquitoes in**  
449 **training and test data sets, showing uniform distribution of errors (un-biased estimating)**  
450 **across actual age classes of mosquitoes for ANN binary classifiers and un-uniform (biased**  
451 **estimating) distribution for PLS classifiers. (TIFF)**

452

453 **S1 Table: Comparison of accuracies between directly trained binary classifiers and regressors**  
454 **interpreted as binary classifiers. Results from ten-fold Monte Carlo cross-validation (TIFF**  
455 **and DOCX)**

456

457 **S1 Appendix. Excel file with the *Anopheles gambiae* spectra used in the analysis. Column**  
458 **header, wavelengths in 'nm'. (XLSX)**

459

460 **S2 Appendix. Excel file with the *Anopheles arabiensis* spectra used in the analysis. Column**  
461 **header, wavelengths in 'nm'. (XLSX)**

462

463 **S3 Appendix. Matlab code used to run the analysis for *Anopheles gambiae*. (M)**

464

465 **S4 Appendix. Matlab code used to run the analysis for *Anopheles arabiensis*. (M)**

**A** *An. gambiae*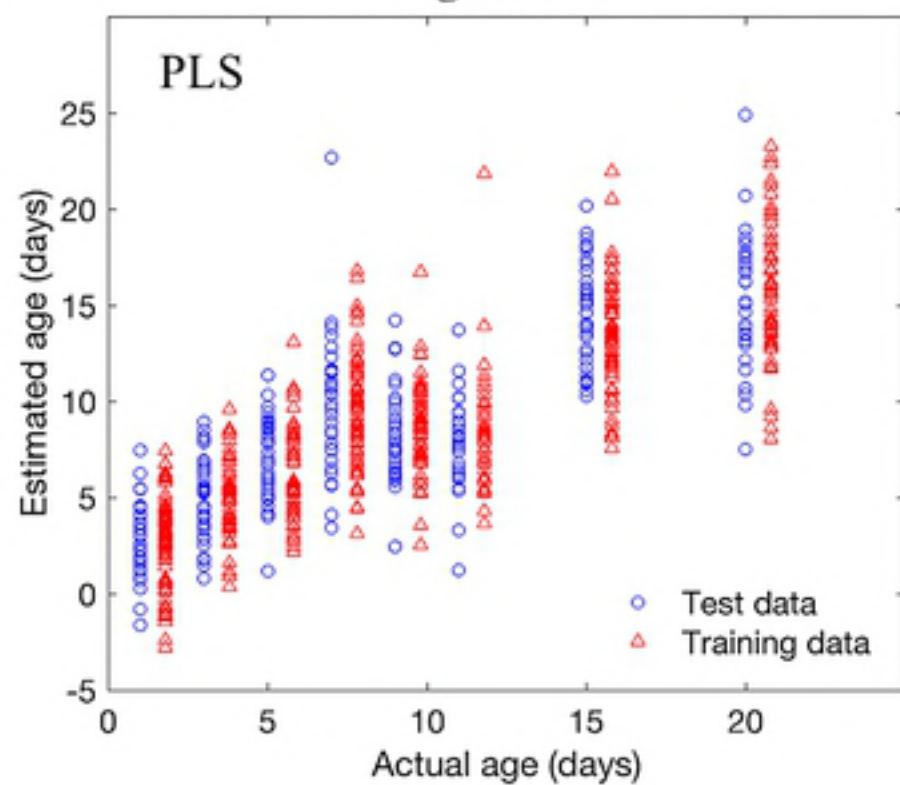**B** *An. gambiae*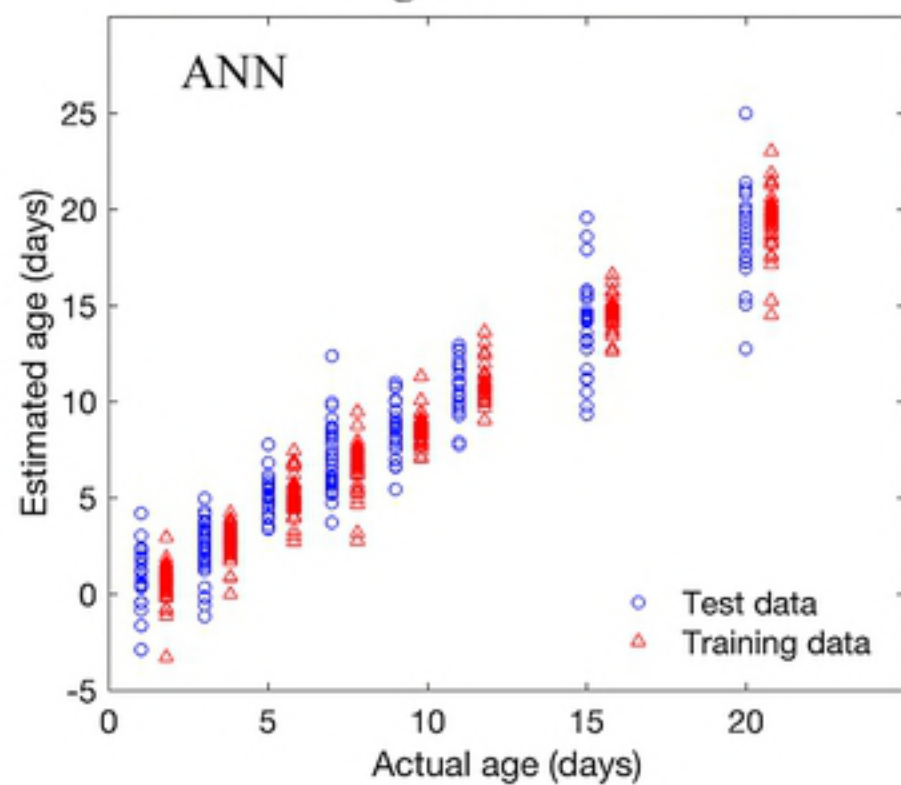**C** *An. arabiensis*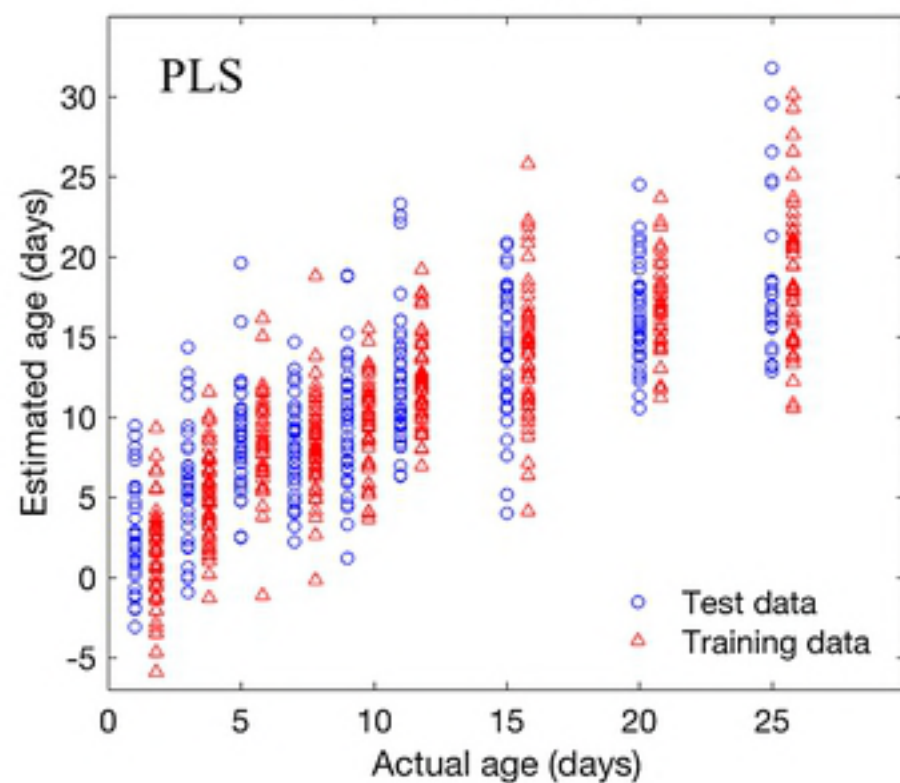**D** *An. arabiensis*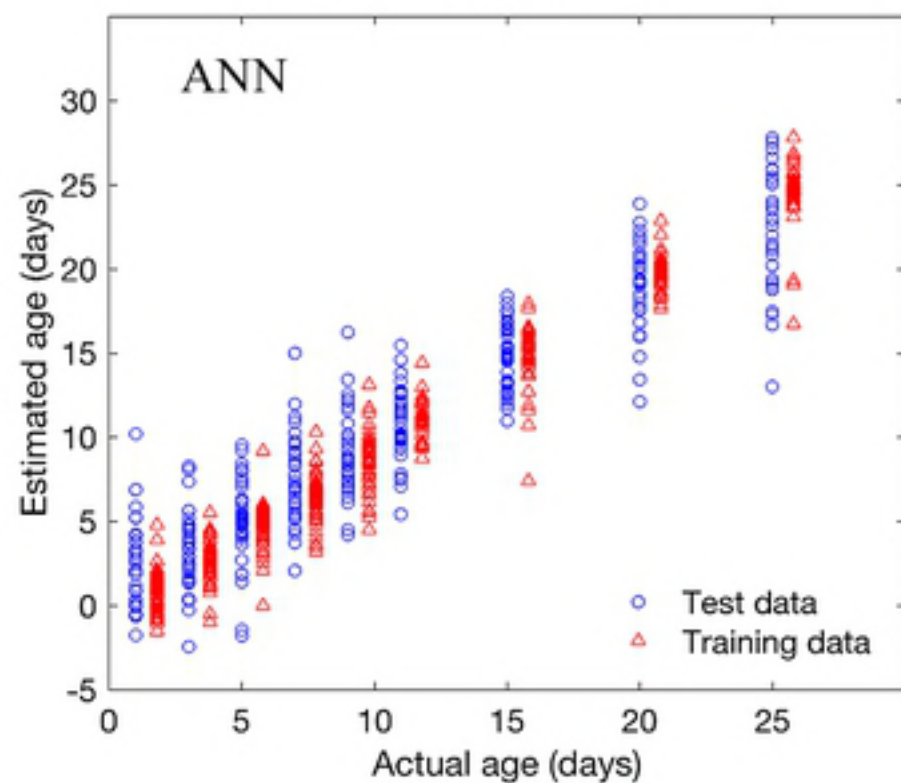

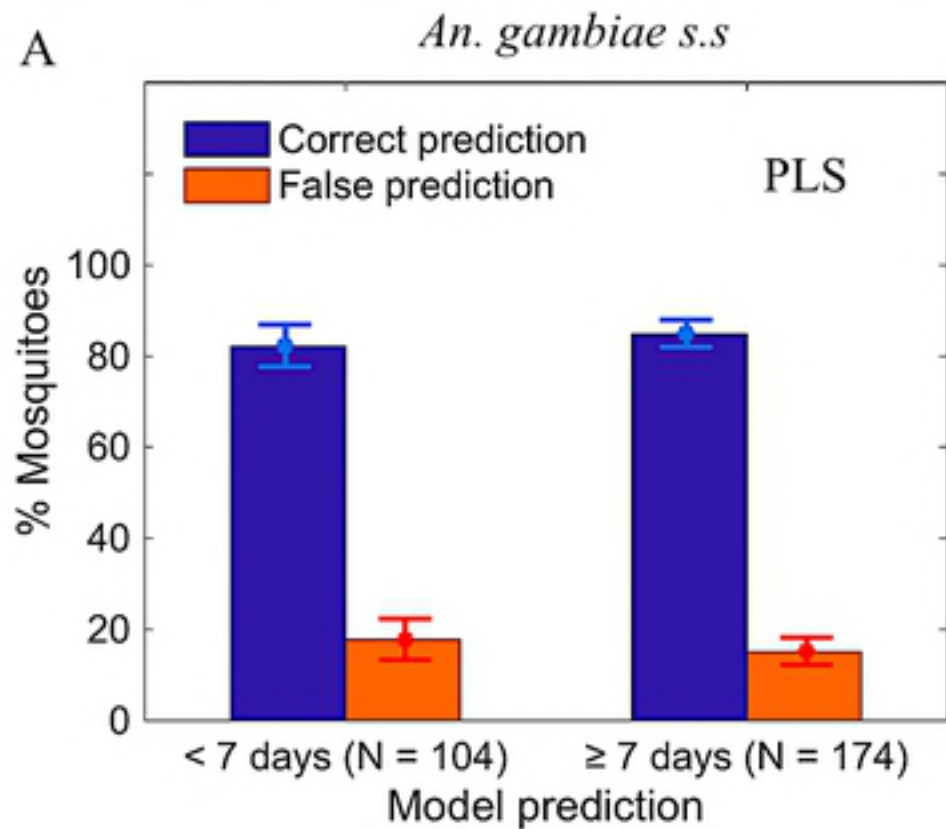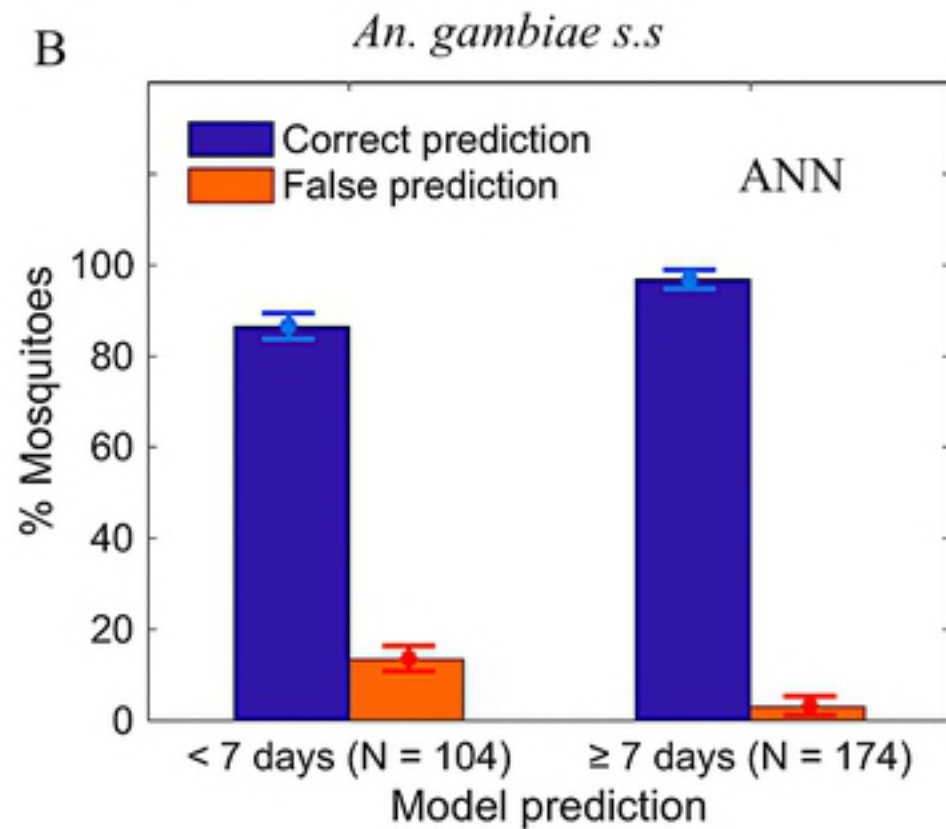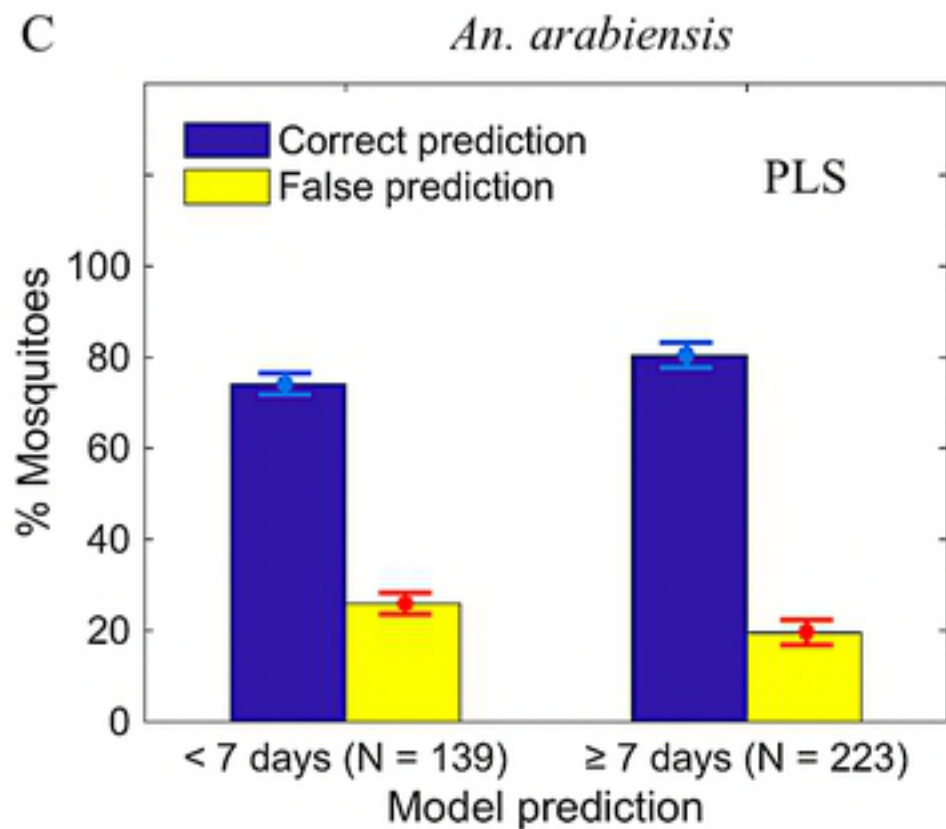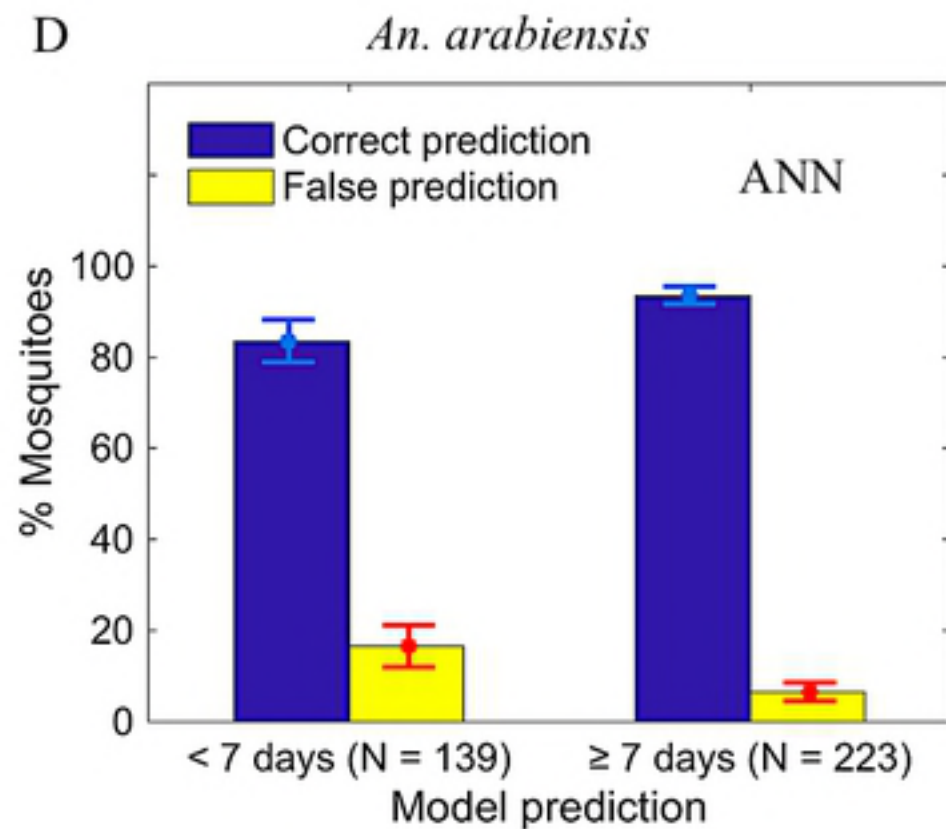



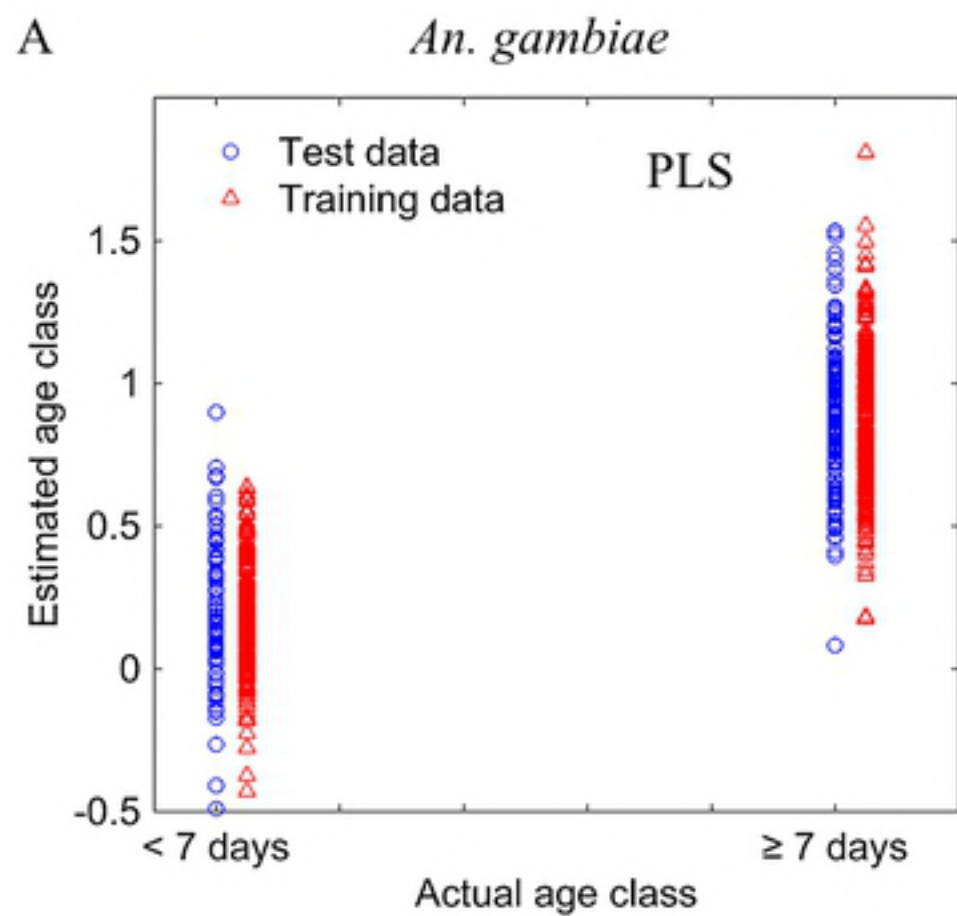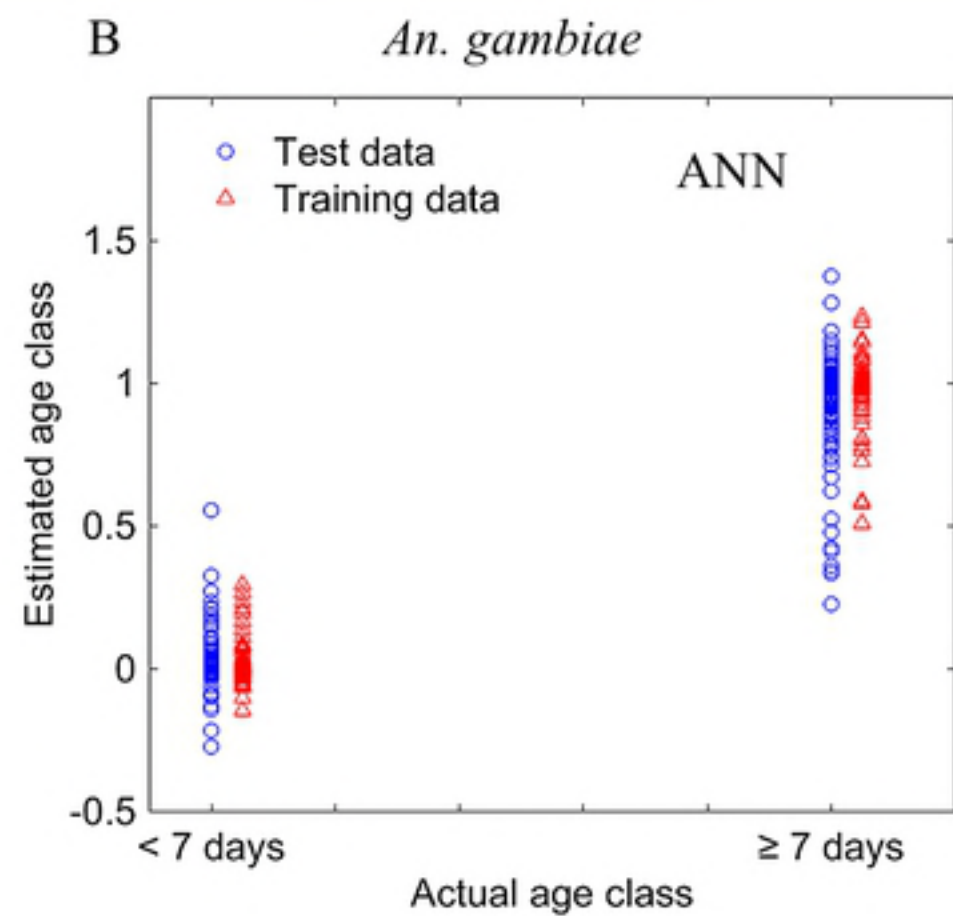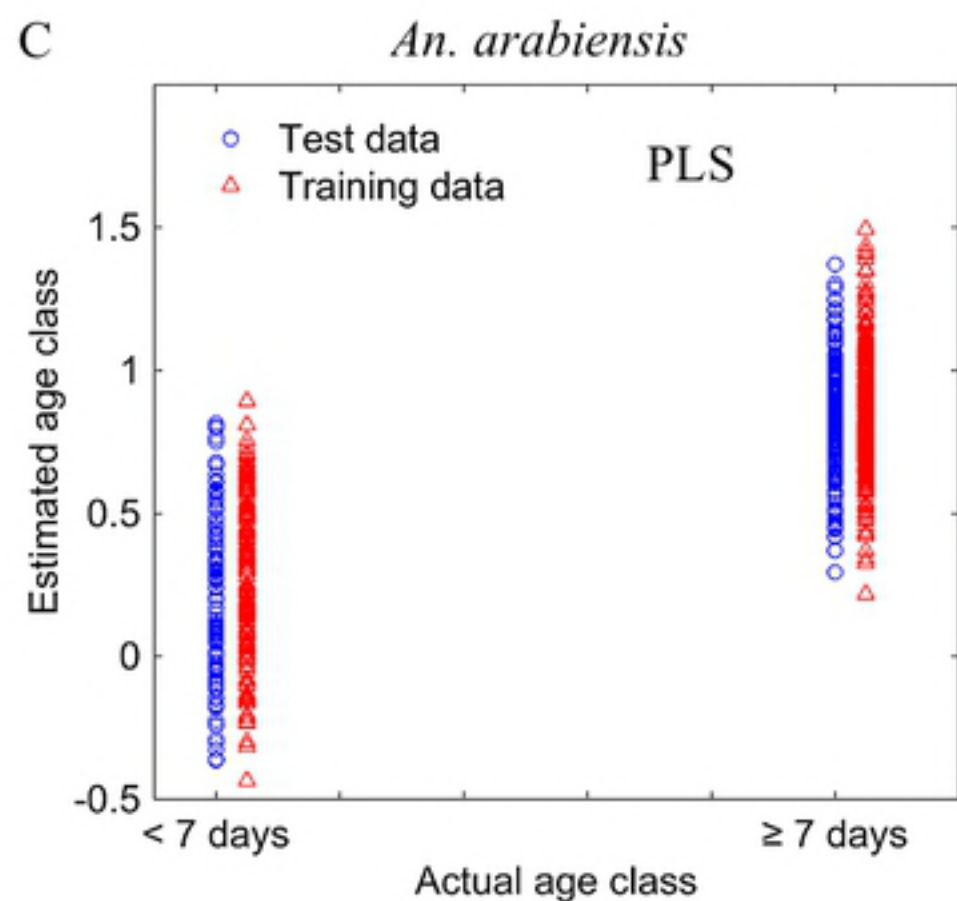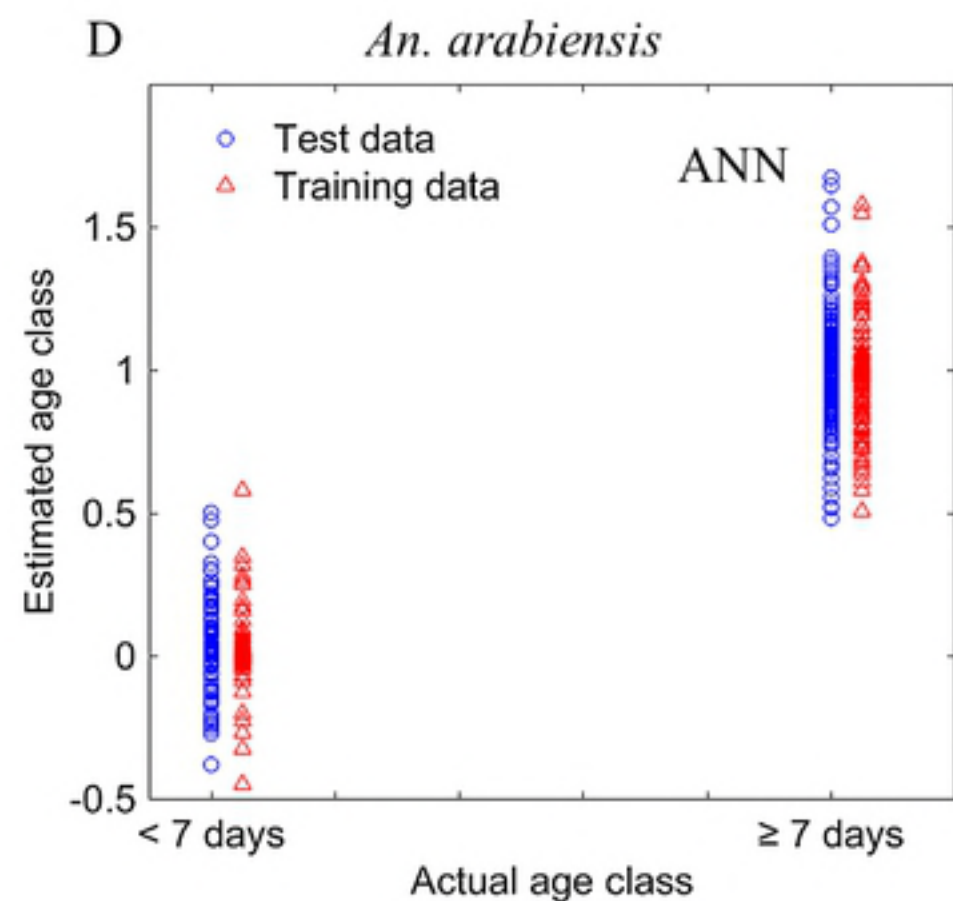

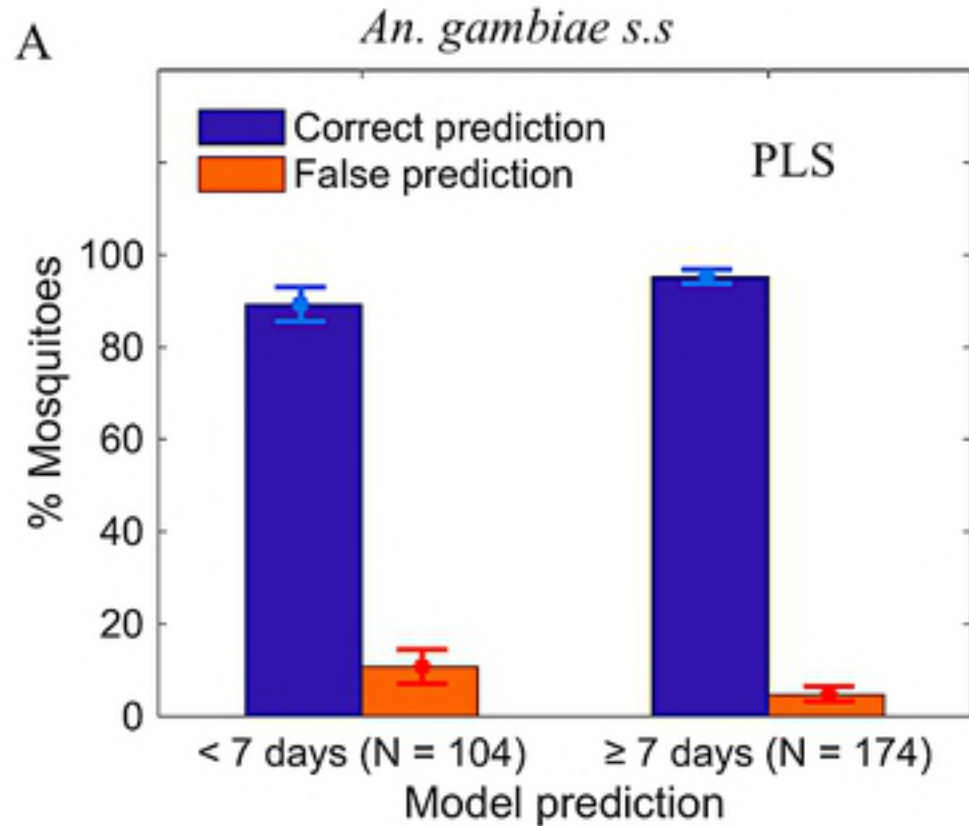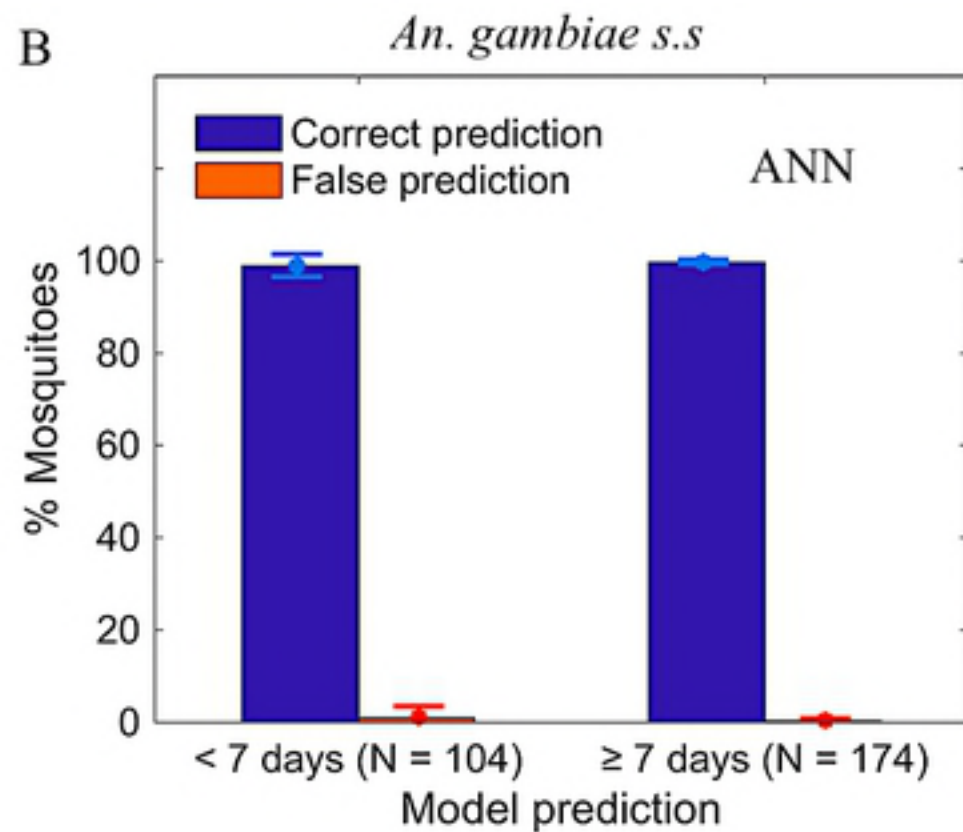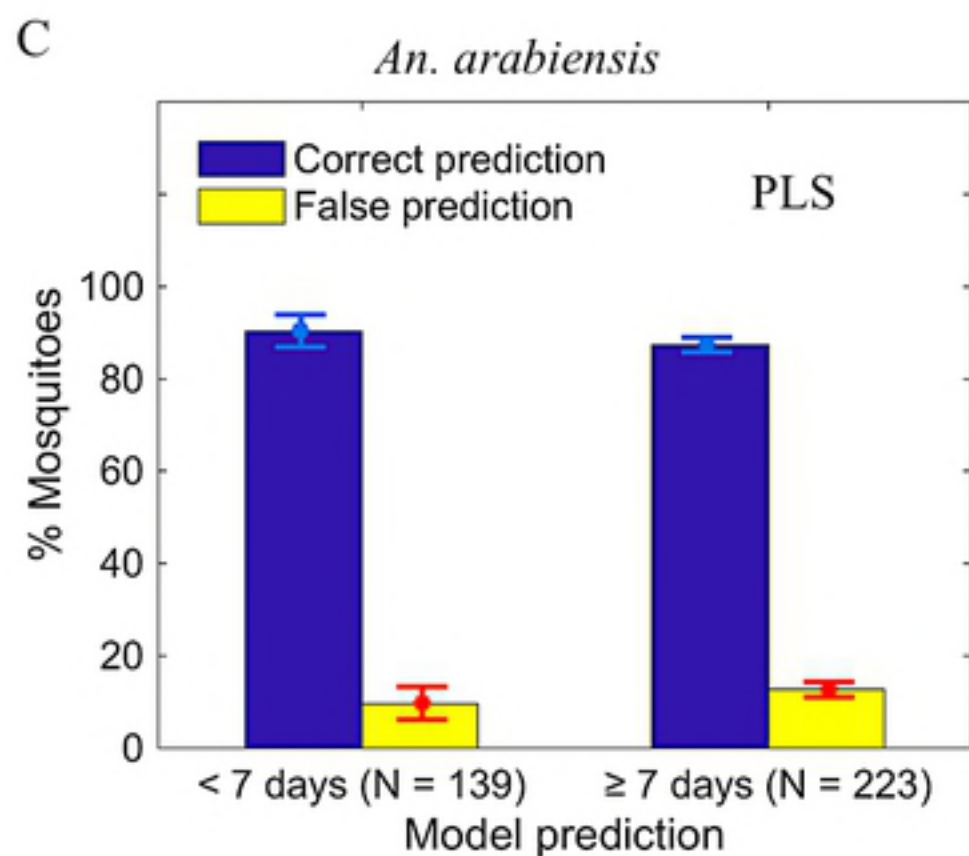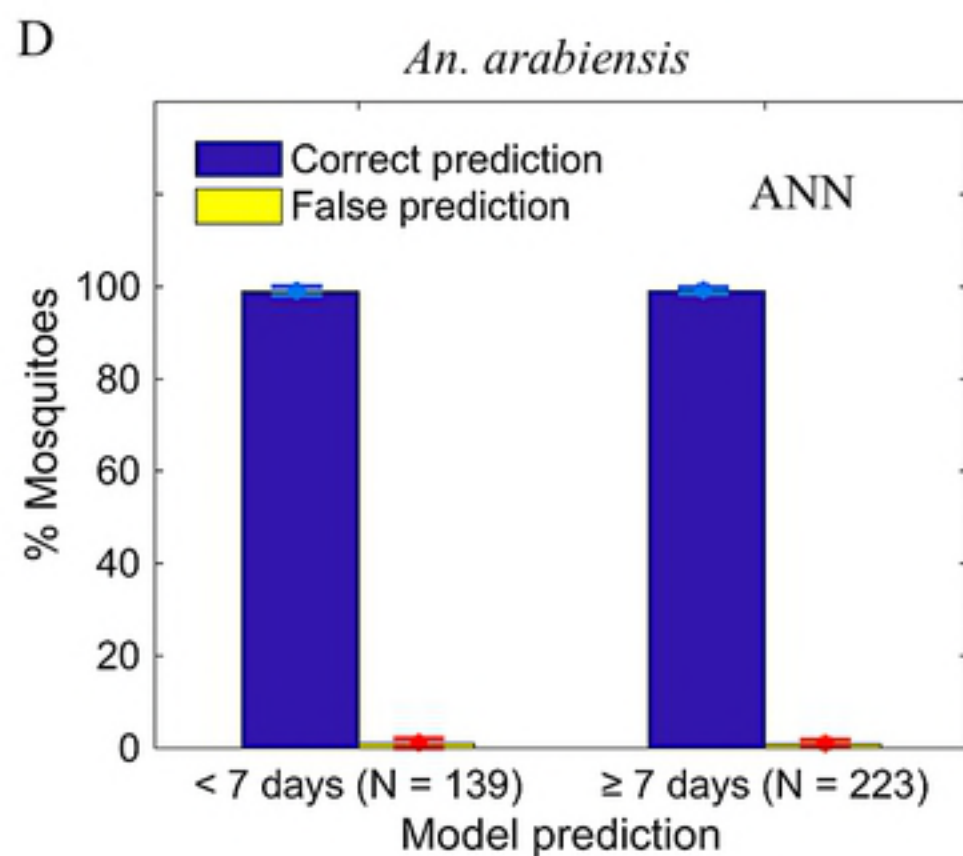



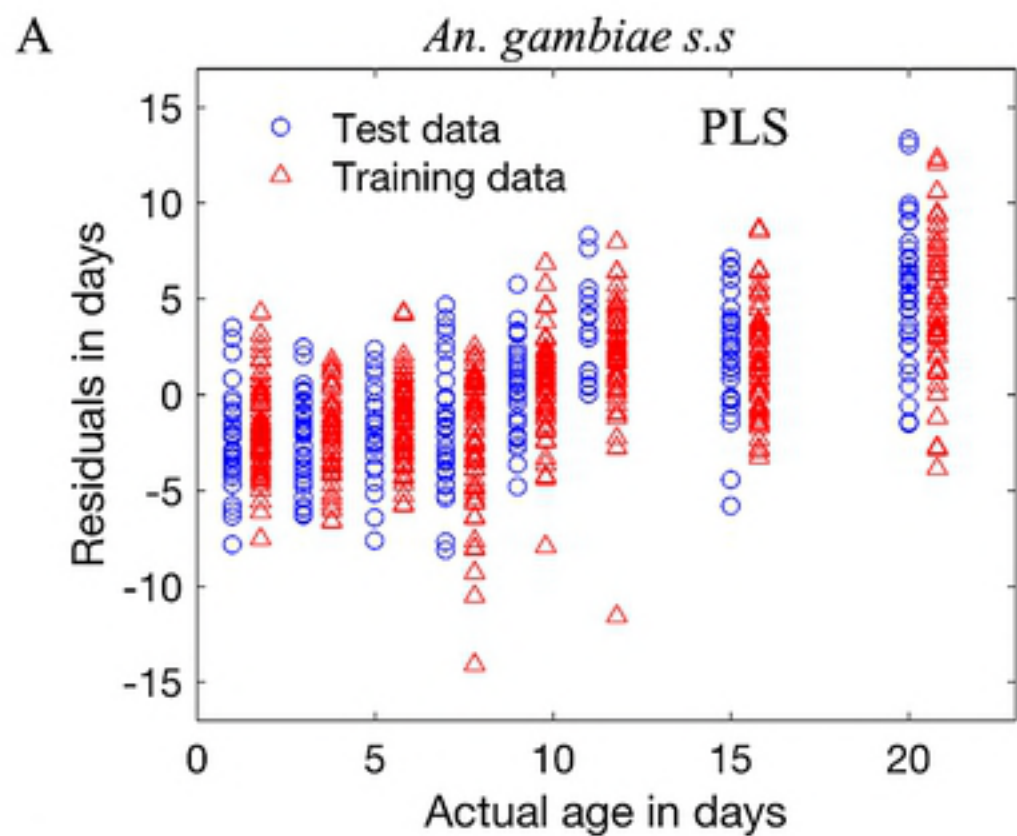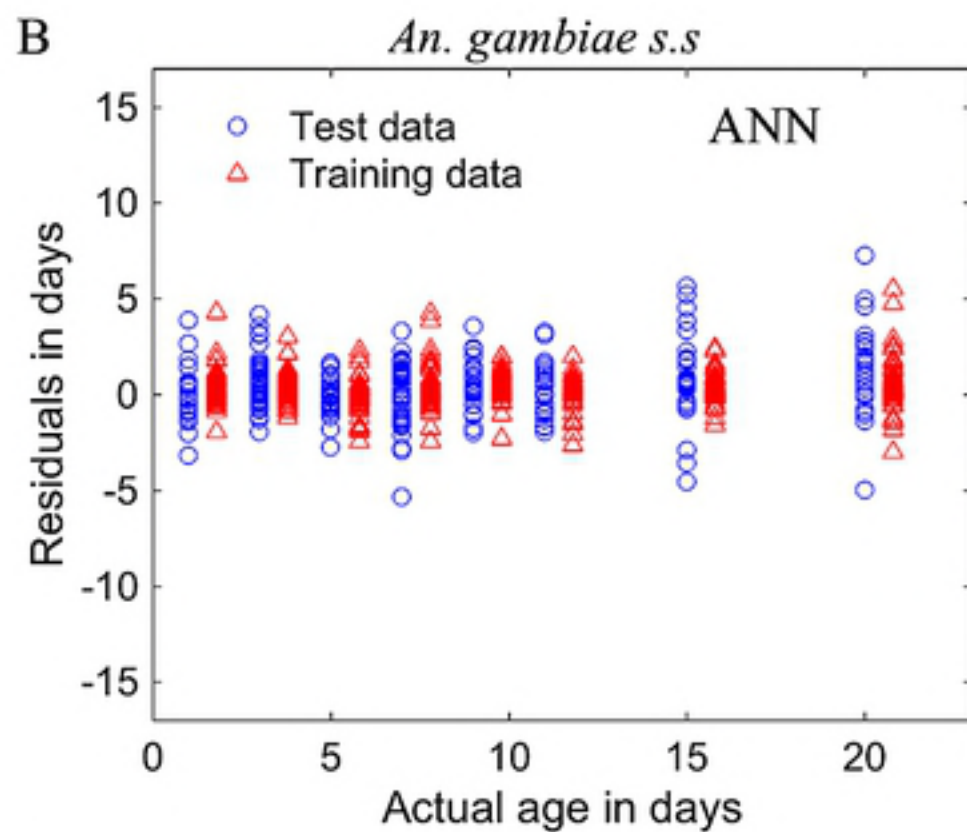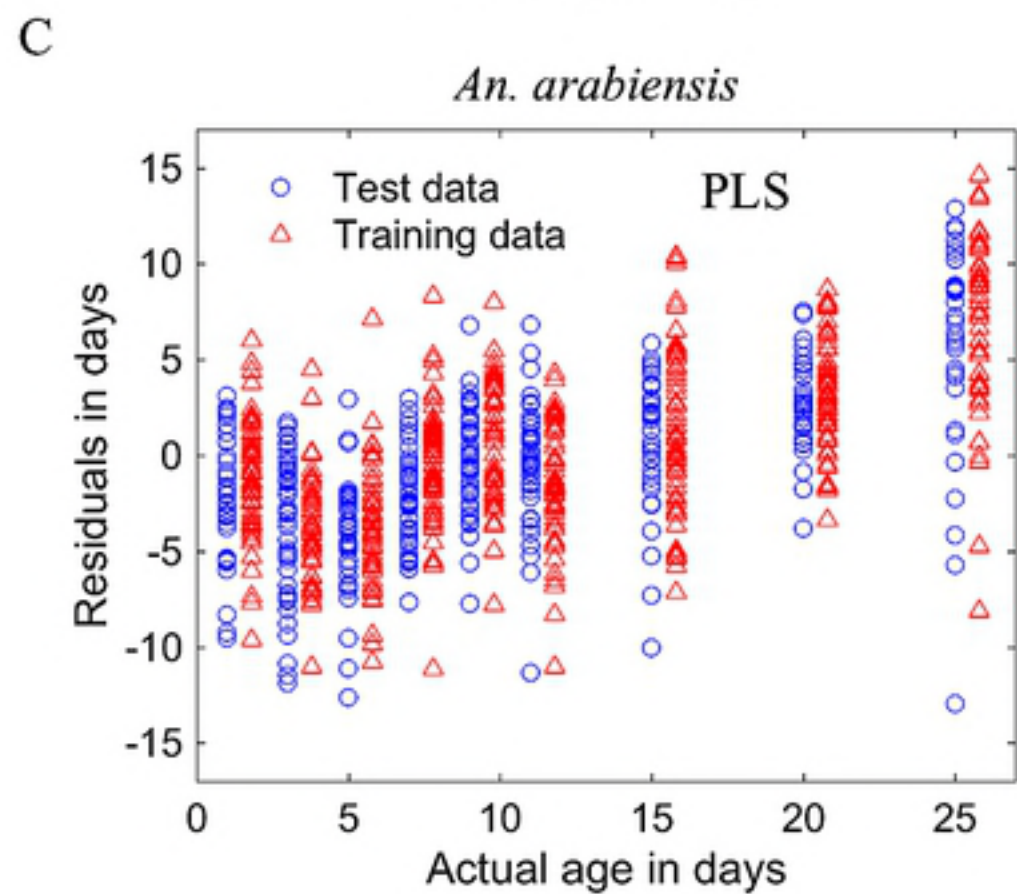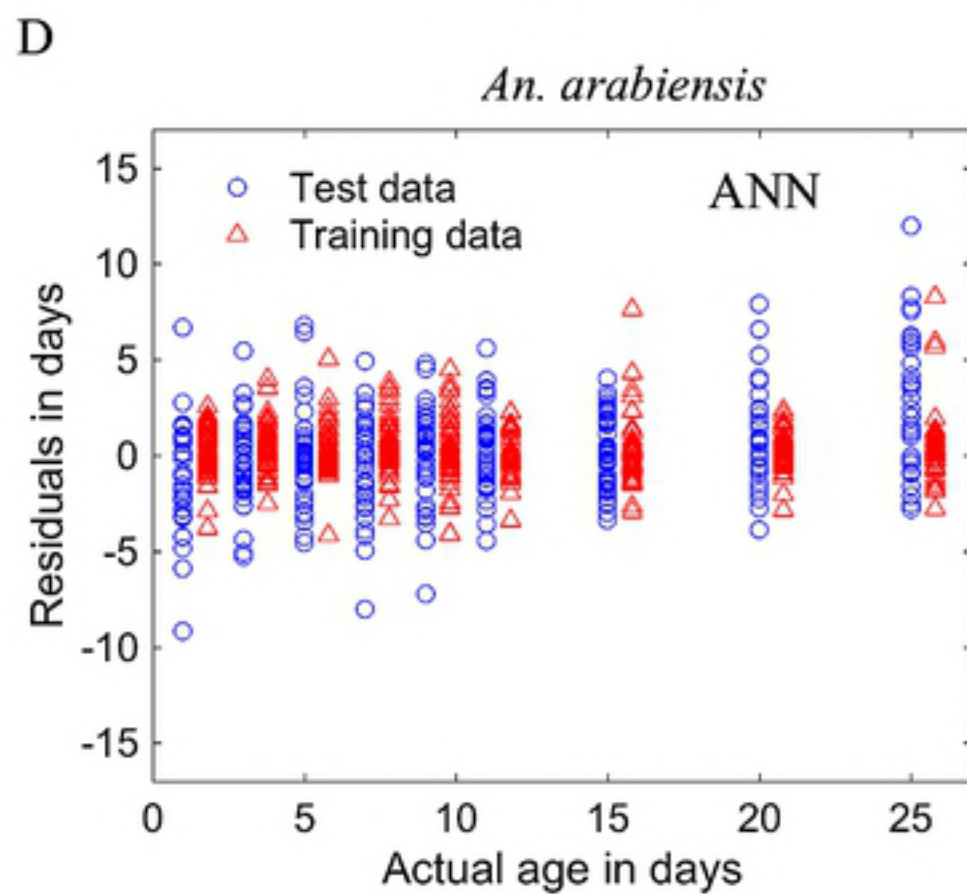

Source: https://www.biorxiv.org/content/10.1101/490326v1.full.pdf
